# Supplementary material for: Pharmacological SARM1 inhibition protects axon structure and function in paclitaxel-induced peripheral neuropathy
Source: Oxford University Press journal article supplement (doi:10.1093/brain/awab184), 2021-05-06
Supplement: awab184_supplementary_data.pdf [file awab184_supplementary_data.pdf]

| %inhibition @ 10uM | Compound 4 | Compound 9 | Compound 10 |
|--------------------|------------|------------|-------------|
| <b>SARM1</b>       | 100        | 100        | 100         |
| <b>PARP1</b>       | 41         | 8          | 3           |
| <b>PARP2</b>       | 25         | 4          | 0           |
| <b>TNKS1</b>       | 20         | 2          | 5           |
| <b>TNKS2</b>       | 31         | 5          | 1           |
| <b>CD38</b>        | 0          | 1          | 0           |
| <b>SIRT1</b>       | 13         | 10         | 7           |
| <b>NAMPT</b>       | 3          | 1          | 2           |
| <b>NMNAT1</b>      | 54         | 39         | 67          |

**Supplementary Table 1.** Selectivity profile of isothiazoles.

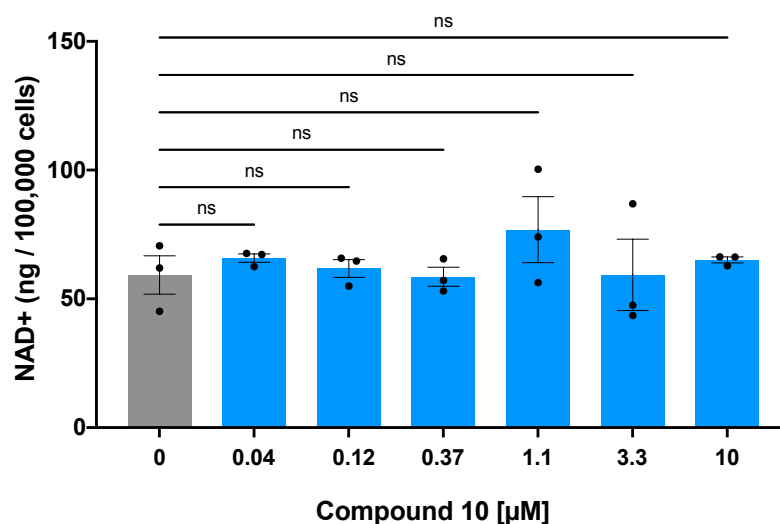

**Supplementary Figure 1. Isothiazole SARM1 inhibitors do not prevent NAD<sup>+</sup> synthesis.**

Intact mouse DRG neurons were exposed to isothiazole compound (**10**) and NAD<sup>+</sup> levels were measured after 22h. No significant changes in NAD<sup>+</sup> were observed. Values represent Mean ± SEM. One-way ANOVA with Holm-Sidak post-hoc  $F(6, 14) = 0.6588$ ;  $n=3$ /group; ns: not significant.

**A**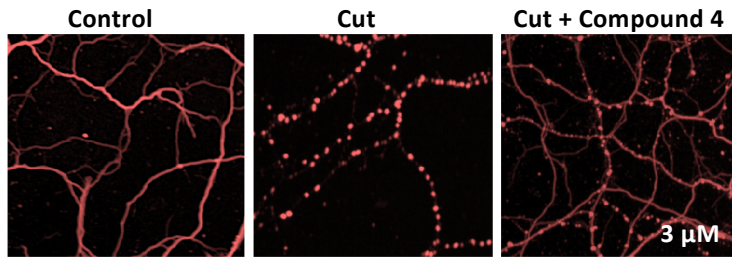**B**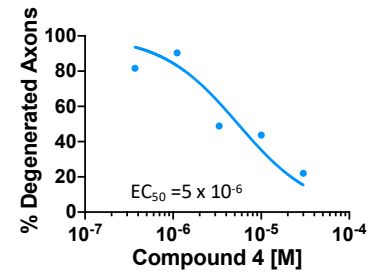

**Supplementary Figure 2. Isothiazole SARM1 inhibitors protect human axons in vitro.**

**A)** Human IPSC-derived motor neurons were treated with 3  $\mu$ M isothiazole SARM1 inhibitor compound **4**, subjected to axotomy, and examined at 16 h (right panel). Scale bar, 25  $\mu$ M. **B)** Quantification of fragmentation 16 h post-axotomy showed dose-dependent protection by compound **4**, with an  $EC_{50} = 5 \mu$ M. Values represent Mean  $\pm$  SEM.  $n=4$ ; representative of 2 independent experiments with similar results.

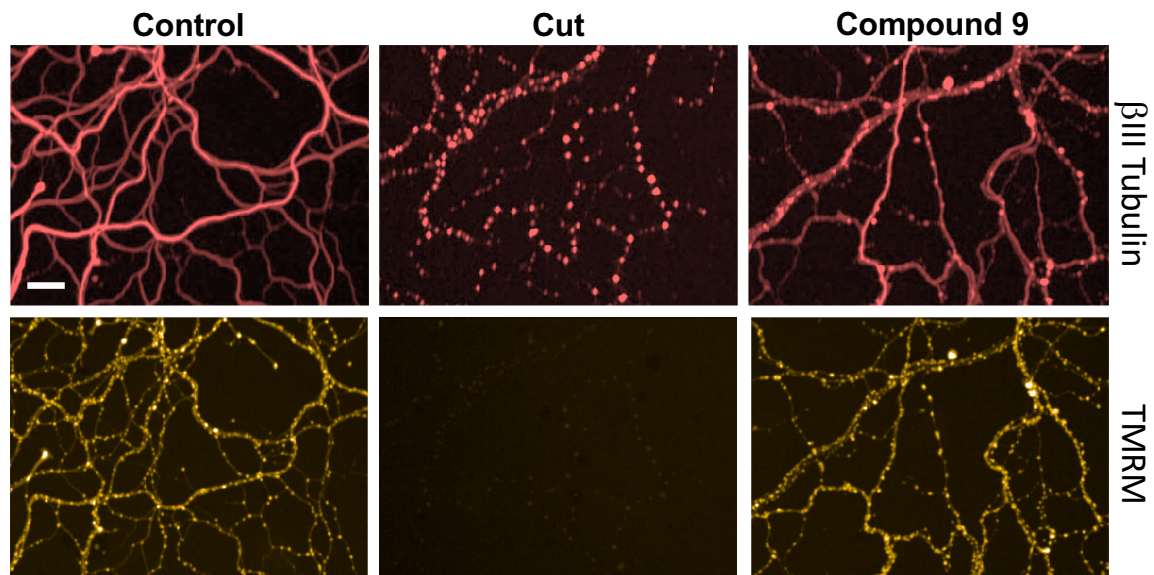

**Supplementary Figure 3. SARM1 inhibition with isothiazoles preserves mitochondrial viability.** Mouse DRG neurons were exposed to Isothiazole compound (**9**) for 2h and then subject to axotomy. Cultures were examined 16 h later for axonal morphology ( $\beta$ III-tubulin; top panels) and TMRM fluorescence (bottom panels). Scale bar, 25  $\mu$ M. Representative images of n=4

**A**

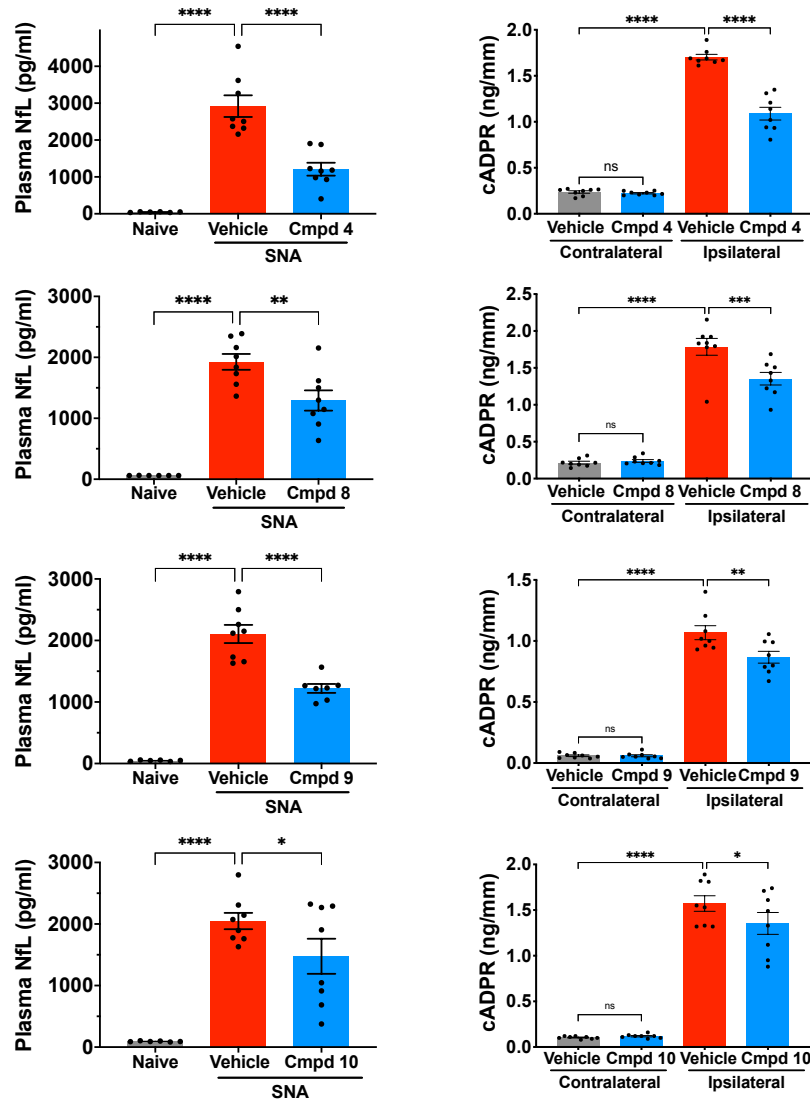

**B**

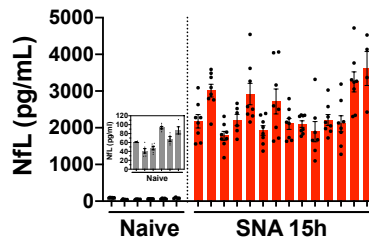

**Supplementary Figure 4. Isothiazoles inhibit SARM1 in vivo. A)** Mice were treated with isothiazole SARM1 inhibitors **4**, **8**, **9**, and **10** at the doses indicated and subjected to unilateral SNA 30 min after the first dose. Compounds **4**, **8**, and **9** received a second dose administered 8 hours after the first dose. 15 h after SNA NfL levels were measured in plasma and cADPR levels were measured in cut and uncut contralateral nerves. Compounds **4** (30 mg/kg), **8** (120 mg/kg) and **9** (45 mg/kg) were dosed by intraperitoneal injection and compound **10** (300 mg/kg) was dosed orally. All compounds prevented increases in plasma NfL and cADPR. Values represent Means  $\pm$  SEM. Compound **4**, NfL, ANOVA with Holm-Sidak post-hoc  $F(2,19) = 43.18$ ,  $P < 0.0001$   $n=6-8$ /group; cADPR, ANOVA with Holm-Sidak post-hoc  $F(3,28) = 350.8$ ,  $P < 0.0001$ ,  $n=8$ . Compound **8**, NfL, ANOVA with Holm-Sidak post-hoc  $F(2,19) = 46.02$ ,  $P < 0.0001$   $n=6-8$ /group; cADPR, ANOVA with Holm-Sidak post-hoc  $F(3,28) = 120.1$ ,  $P < 0.0001$ ,  $n=8$ . Compound **9**, NfL, ANOVA with Holm-Sidak post-hoc  $F(2,18) = 90.68$ ,  $P < 0.0001$   $n=6-8$ /group; cADPR, ANOVA with Holm-Sidak post-hoc  $F(5,42) = 131.5$ ,  $P < 0.0001$ ,  $n=7-8$ /group. Compound **10**, NfL, ANOVA with Holm-Sidak post-hoc  $F(2,19) = 23.17$   $P < 0.0001$   $n=6-8$ /group; cADPR, ANOVA with Holm-Sidak post-hoc  $F(3,28) = 113.7$ ,  $P < 0.0001$ ,  $n=8$ . ns not significant; \*  $p < 0.05$ ; \*\*  $p < 0.01$ ; \*\*\*  $p < 0.001$ ; \*\*\*\*  $p < 0.0001$ . **B)** Baseline plasma NfL levels from 6 independent naïve cohorts ( $n=4-6$ ; gray bars), and mean plasma NfL levels 15 hours after SNA in 14 independent cohorts ( $n=6-8$ ). The inset shows an enlarged view of the naïve cohorts.

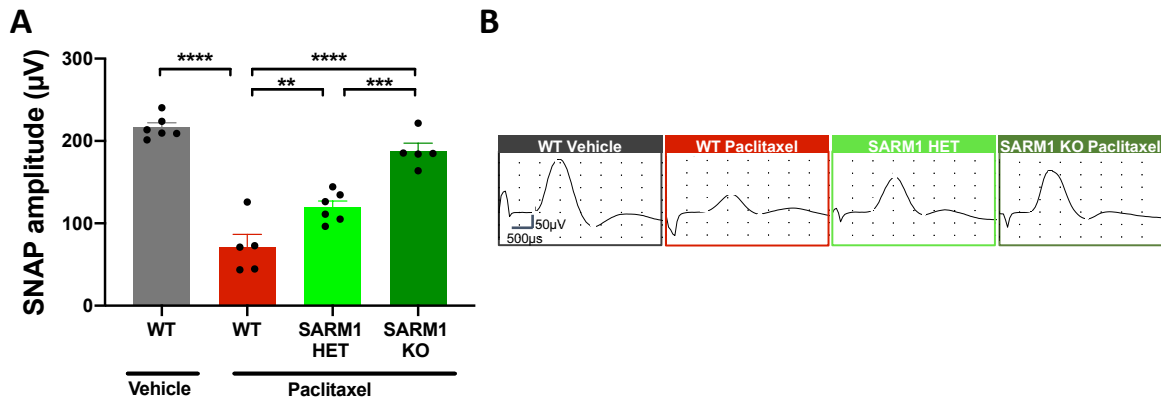

**Supplementary Figure 5. SARM1 loss of function prevents decreases in SNAP amplitudes induced by paclitaxel.** WT, SARM1 heterozygous (HET) and SARM1 null mutant mice were treated with 2 doses of 50 mg/kg paclitaxel of days 1 and 2. 15 Days after the first dose of paclitaxel, SNAP amplitudes of the tail nerves were recorded as described in Methods. **A)** Paclitaxel induced a 67% decrease in SNAP amplitude in WT. SARM1 mutants showed gene-dosage protection of SNAP amplitudes. Values represent Mean +/- SEM, ANOVA with Holm-Sidak post-hoc  $F(3,18) = 47.18$ ,  $P < 0.0001$ ,  $n=5-6$  per group; \*\*  $p < 0.01$ ; \*\*\*  $p < 0.001$ ; \*\*\*\*  $p < 0.0001$ . **B)** Representative SNAP traces from the groups analyzed in panel (A).
